# Supplementary material
Source: publisher site journal article supplement (https://www.dovepress.com/article/410611)
Supplement: Supplementary file 1 [file get_supplementary_file.php]

**Supplementary Table 1. Proposed outline of the content of the self-administration program to be discussed and agreed upon by the participants through consensus**

| **Rationale of the programa** |
| --- |
| **Patient profile and clinical evaluation** |
| 1. Assessment of patient candidates for self-administration based on their social situation (distance from the hospital, active work life, work/family conciliation...) 2. Selection and characterization of the patient profile in terms of their training, motivation and wishes regarding the treatment administration modality, and adequate management of their expectations |
| **Role of the health care professionals (HCP) involved** |
| 1. Pneumology: evaluation of compliance with the established selection criteria, to inform the patient, assessment of their degree of motivation and detection of therapeutic adherence or possible complications. 2. Nursing: training in the administration technique, detection of possible complications and how to manage them, preparation of the drug 3. Pharmacy: dispensing and control of therapeutic adherence.   Define specifically the HCP in charge of patient training.  Specify an action plan as explicit as possible regarding the assignment of the person responsible for the self-administration program, especially in the areas of patient information, medication request, patient training, capacity assessment, medication delivery, follow-up and contact in case of emergency. |
| **Training** |
| Explain the meaning of self-administration: when the product is administered by the patient him or herself or by a family member or caregiver, that is, an administration who does not involve the intervention of an HCP. In this way, home-based administration by a nurse is ruled out.   1. Supervision of the patient’s learning process and supervised training in the first 3–4 infusions (minimum number of administrations supervised by an HCP, number, support at home in the first infusions via telematics) 2. The need to objectively assess the patient's capacity for self-administration once the supervised learning has been completed (objective, final assessment prior to transfer of treatment to self-administration at home [checklist of actions to be carried out by the patient for self-administration]) possibly by the nursing staff, delivery of a certificate confirming that the criteria established in the training program have been met, and evaluation of the motivation/desire of the patient when facing this type of treatment administration. 3. The need to structure the patient's training and to manage possible problems that may arise during administration (e.g., difficulty in locating the vein) |
| **Logistical aspects (preparation, conservation and dispensing of the drug)** |
| 1. Disposal of waste products resulting from self-administration (needles, vials, etc.). 2. Control of the periodicity with which to collect the medication. The frequency of medication collection by the patients must be sufficiently spaced out so that it represents a perceptible advantage for the patient but it is agreed with the Hospital Pharmacy. 3. Delivery to patients of a list of basic material necessary for self-administration, defining the agent responsible for their delivery. Elements included in the set to start the process and components that must be provided by the patient himself (container for sharps, alcohol wipes, disinfectant, etc.). |
| **Monitoring of treatment, control of adherence and patients’ support.** |
| 1. Evaluation of adherence to treatment and control of the dispensing of the drug. 2. Provide the patient with a manual that contains basic instructions and an action plan if there is a situation where side effects or red flag symptoms appear. Establish a reference person in case of emergencies (inform the patient beforehand about the possible problems that may arise with this type of administration). 3. Definition of which supportive professionals will be available for the patient at the time of self-administration (bear in mind that it is a scheduled medication and urgent that it be administered once the drug is prepared; therefore, the patient should adjust the administration schedule so that, in the event any problem arises, the patient can receive the necessary support for the correct infusion of the medication). |
| **Ethical and regulatory issuesa** |

a Regulatory issues were not discussed during the process of developing these recommendations and are not included in this document due to the variation across countries
